# Supplementary material for: Combination of machine learning and data envelopment analysis to measure the efficiency of the Tax Service Office
Source: PeerJ journal article supplement (doi:10.7717/peerj-cs.2672), 2025-02-17
Supplement: A3.pdf [file A3.pdf]

**Table A3.** Columns list and description.

| Column | Unit      | Description                                     |
|--------|-----------|-------------------------------------------------|
| DMU    | -         | Masked tax service office code                  |
| Vin1   | taxpayer  | Number of Treasury Taxpayers                    |
| Vin2   | taxpayer  | Number of corporate taxpayers                   |
| Vin3   | taxpayer  | Number of individual taxpayers (employees)      |
| Vin4   | taxpayer  | Number of non-employee taxpayers                |
| Vin5   | employee  | Number of Tax Auditors                          |
| Vin6   | employee  | Number of Account Representatives               |
| Vin7   | IDR       | Budget realization amount                       |
| Vout1  | percent   | Compliance rate of annual tax return submission |
| Vout2  | percent   | Percentage of revenue achievement               |
| Vout3  | percent   | Percentage of revenue growth achievement        |
| Vout4  | letter    | Number of issued tax advisories                 |
| Vout5  | letter    | Number of tax advisories that have been paid    |
| Vout6  | tax audit | Number of completed tax audits                  |
