# Supplementary material for: Combination of machine learning and data envelopment analysis to measure the efficiency of the Tax Service Office
Source: PeerJ Comput Sci. 2025 Feb 17;11:e2672. doi: 10.7717/peerj-cs.2672 (PMC11888853; doi:10.7717/peerj-cs.2672)
Supplement: Supplemental Information 1 [file peerj-cs-11-2672-s001.xlsx]

## Sheet: Sheet1
Cluster	Count	DMU
		DMU C0, FMO, EDA, FDD, LGN, MGU, LGU, MKU, TXM, CVU, JUB, OST, FGS, BWM, UZL, XDU, TPX, ZEV, EML, WQN, QQR, FDS, JQN, YHS, BBY, FZR, PCU,
C0	65
C1	149
C2	138
CCN, WCK, UUB, LOY, YOM, PUW, IGK, AFV, QYI, KSB, TWU, MPN, TNA, PMV, FGT, MKV, OPL, TXJ, UCQ, EPF, ZML, AHA, EWI, ELZ, IAE, NNT, YYK, QNU, BCM, QAO, NZT, RCN, EGZ, PUU, XXV, UWF, XXM, FIA, CWS
DMU C1, CQL, WOO, VXK, BEZ, QHN, PER, YFL, EUD, FDQ, STU, YSN, QHD, JPX, MKE, BVA, HYD, ZCZ, NMT, ITE, QNP, CBU, WZZ, BID, FYN, JHB, QYX, PYA, AIY, IOO, YOG, RNY, FLM, MPX, OLF, DKR, EZL, VMY, SWE, UOE, FJN, TFB, BPY, XHH, ICZ, URH, ZND, LUA, MOK, GXQ
DMU C2, EXA, FYO, MMR, PGK, PLM, ZXP, KYR, CUP, LFM, YDL, SXY, URG, ZYA, TKM, YZN, OUE, JVA, WUD, PDZ, RJU, MIM, ZDR, AUW, MAK, BZH, KXW, SWM, NCN, YRV, OAQ, GZG, MWI, MNX, KKT, LBI, PLH, ALV, XZM, DCL, GTE, ELQ, ZGO, UBW, AMN, IMW, RYE, SHC, KTC, IJN, AKI, YWG, NLF, GWT, YBU, LHS, FZI, NVW, YHJ, VDP, EOF, KWD, BAS, VVS, YFI, UFE, EOO, VVB, DYV, XYN, VYR, XJB, RLR, WKL, HKS, IJL, TIL, TLS, ORS, N…
