# Supplementary material for: Combination of machine learning and data envelopment analysis to measure the efficiency of the Tax Service Office
Source: PeerJ Comput Sci. 2025 Feb 17;11:e2672. doi: 10.7717/peerj-cs.2672 (PMC11888853; doi:10.7717/peerj-cs.2672)
Supplement: Supplemental Information 3 [file peerj-cs-11-2672-s003.xlsx]

## Sheet: Sheet1
ID	Vin1	Vin2	Vin3	Vin4	Vin5	Vin6	Vin7	Vout1	Vout2	Vout3	Vout4	Vout5	Vout6
CQL	0.01	0.18	0.26	0.09	0.09	0.45	0.08	0.39	0.52	0.13	0.29	0.34	0.05
EXA	0.01	0.29	0.38	0.18	0.39	0.57	0.23	0.41	0.25	0.03	0.59	0.43	0.27
WOO	0.01	0.3	0.34	0.11	0.24	0.55	0.22	0.6	0.64	0.48	0.35	0.32	0.14
≈	≈	≈	≈	≈	≈	≈	≈	≈	≈	≈	≈	≈	≈
CTF	0.07	0.13	0.28	0.1	0.04	0.64	0.3	0.44	0.14	0.1	0.39	0.34	0.05
OXP	0.26	0.16	0.29	0.17	0.02	0.25	0.34	0.6	0.51	0.15	0.06	0.17	0.02
QXY	0.23	0.48	0.37	0.12	0.04	0.23	0.21	0.41	0.31	0.09	0.42	0.26	0.14
WBP	0.21	0.15	0.18	0.1	0.04	0.16	0.09	0.38	0.64	0.22	0.15	0.13	0
