# Supplementary material for: Combination of machine learning and data envelopment analysis to measure the efficiency of the Tax Service Office
Source: PeerJ Comput Sci. 2025 Feb 17;11:e2672. doi: 10.7717/peerj-cs.2672 (PMC11888853; doi:10.7717/peerj-cs.2672)
Supplement: Supplemental Information 4 [file peerj-cs-11-2672-s004.xlsx]

## Sheet: Sheet1
Cluster	Centroid
	0.106212241679649, 0.379994041367827, 0.48092567989999,
C0	0.353816750556192, 0.227735277731225, 0.573628234029696,
	0.277749
	0.0996510529546361, 0.214858651444736, 0.277188498642977,
C1	0.224062057264608, 0.132097840088478, 0.361462054305785,
	0.184743
	0.0089195173116441, 0.101621868876907, 0.0455975123539547,
C2	0.0285237880619545, 0.553745261690683, 0.578091083638992,
	0.279831
