# Supplementary material for: Combination of machine learning and data envelopment analysis to measure the efficiency of the Tax Service Office
Source: PeerJ Comput Sci. 2025 Feb 17;11:e2672. doi: 10.7717/peerj-cs.2672 (PMC11888853; doi:10.7717/peerj-cs.2672)
Supplement: Supplemental Information 5 [file peerj-cs-11-2672-s005.xlsx]

## Sheet: Sheet1
Variable	count	mean	std	min	0.25	0.5	0.75	max
Vin1	352	416	508	-	42	257	632	4.995
Vin2	352	6.056	3.503	295	3.27	5.637	8.226	22.32
Vin3	352	38.391	26.517	-	20.347	38.635	53.784	123.848
Vin4	352	13.224	10.308	-	5.316	12.542	19.436	56.942
Vin5	352	15	9	3	7	14	20	49
Vin6	352	32	7	10	26	32	36	54
Vin7	352	10.158	2.7	5.819	8.604	9.68	10.978	23.27
Vout1	352	104	7	76	101	102	106	147
Vout2	352	125	13	102	117	123	132	173
Vout3	352	40	37	-22	19	31	51	293
Vout4	352	1.497	823	173	916	1.335	1.912	4.682
Vout5	352	1.351	734	94	806	1.253	1.776	5.107
Vout6	352	355	164	101	249	329	438	1.91
