# Supplementary material for: Combination of machine learning and data envelopment analysis to measure the efficiency of the Tax Service Office
Source: PeerJ Comput Sci. 2025 Feb 17;11:e2672. doi: 10.7717/peerj-cs.2672 (PMC11888853; doi:10.7717/peerj-cs.2672)
Supplement: Supplemental Information 6 [file peerj-cs-11-2672-s006.xlsx]

## Sheet: Sheet1
CLUSTER	EFFICIENT DMUs	NOT EFFICIENT DMUs
FMO, EDA, MGU, LGU, MKU, TXM, CVU, JUB, OST, FGS, BWM, UZL, XDU,
TPX, ZEV, EML, WQN, QQR, FDS, JQN,
CO		YHS, BBY, FZR, PCU, CCN, WCK, UUB, LOY, PUW, IGK, TWU, MPN, PMV, MKV, TXJ, UCQ, EPF, AHA, EWI, ELZ, NNT, YYK, NZT, EGZ, XXV, UWF, XXM, CWS
CQL, WOO, VXK, BEZ, QHN, EUD, FDQ, STU, YSN, QHD, JPX, MKE, BVA, ITE, QNP, CBU, WZZ, FYN, YOG, RNY, FLM, SWE, UOE, FJN, ICZ, ZND, UXK, KOS, LKM, INI, TRG, CPH, ZXV, NQI, ZWL, XDS, EVL, XSX, BMG, TOA, GJL,
C1		SNI, IVW, YIM, HSZ, OZR, OXW, AIQ, DQK, OCM, GIM, QEF, TDT, GPM, YYM, TRB, UZT, FSZ, AIM, DPO, NRA, NEM,
TFW, TSU, BPQ, WII, AZU, JJH, EVI, LVZ, BKP, XXW, XAF, BFX, IRI, MRL, MCB, LBV, ANS, CGW, WUK, TJJ, XNH, VAT, OPY, CTF, OXP, QXY, WBP
EXA, FYO, MMR, PGK, PLM, ZXP, KYR, CUP, LFM, YDL, URG, ZYA, TKM, YZN, WUD, MIM, AUW, BZH, KXW, NCN, YRV, GZG, MWI, MNX, LBI, PLH, XZM, DCL, GTE, ELQ, ZGO, AMN, RYE, YWG, GWT, YBU, LHS, FZI, NVW, VDP, VYR,
C2	RLR, WKL, HKS, TIL, TLS, ORS, NUZ, CNW, HKS, GNR, EMW, XMB, RDF,
MWM, CII, OQZ, RUW, HKF, VJY, GAFB, AGE, LIL, HWZ, OGA, FCJ, VWF, NOZ, YHR, BVN, KAS, ZDE, AGK, TCL, AKY, ACZ, EAR, PMV, SNQ, RFI, BPT, AIJ, JZK, SEL, SPA, XRG, EQN, PJA, CND
FDD, LGN, YOM, AFV, QYI, KSB, TNA, FGT, OPL, ZML, IAE, QNU, BCM, QAO, RCN, PUU, FIA
PER, YFL, HYD, ZCZ, NMT, BID, JHB, QYX, PYA, AIY, IOO, MPX, OLF, DKR, EZL, VMY, TFB, BPY, XHH, URH, LUA, MOK, GXQ, ESI, XAO, LVG, BSU, JKH, KDX, XSX, JTX, AKW, ZAF, CVL, NGY, CPZ, ZEP, GFV, UNF, WXE, KKG, HOB, USH, KJT, MUL, BVY, RPC, GGB, ZOY, ZAD, YJJ, HLU, YCX, REE, RZA, NAX, SGK, LYC, FUU, XWC
SXY, OUE, JVA, PDZ, RJU, ZDR, MAK, SWM, OAQ, KKT, ALV, UBW, IMW, SHC, KTC, IJN, AKI, NLF, YHJ, EOF, KWD, BAS, VVS, YFI, UFE, EOO, VVB, DYV, XYN, XJB, IJL, SBH, OOH, QOQ, DHE, PBB, EXO, BAV, EIG, TNX, JML, GIF, AGQ, ZUH, RJE, HWM, UML, IVN, UPZ
