# Supplementary material for: Combination of machine learning and data envelopment analysis to measure the efficiency of the Tax Service Office
Source: PeerJ Comput Sci. 2025 Feb 17;11:e2672. doi: 10.7717/peerj-cs.2672 (PMC11888853; doi:10.7717/peerj-cs.2672)
Supplement: Supplemental Information 7 [file peerj-cs-11-2672-s007.xlsx]

## Sheet: Sheet1
DMU	Vin1	Vin2	Vin3	Vin4	Vin5	Vin6	Vin7	Vout1	Vout2	Vout3	Vout4	Vout5	Vout6
CQL	-4.93	-1.71	-1.36	-2.45	-2.44	-0.79	-2.53	-0.95	-0.66	-2.01	-1.25	-1.09	-3.07
EXA	-4.6	-1.25	-0.97	-1.72	-0.94	-0.57	-1.48	-0.89	-1.39	-3.64	-0.53	-0.85	-1.32
WOO	-4.75	-1.19	-1.09	-2.18	-1.43	-0.61	-1.53	-0.51	-0.44	-0.74	-1.06	-1.14	-1.94
≈	≈	≈	≈	≈	≈	≈	≈	≈	≈	≈	≈	≈	≈
CTF	-2.69	-2.01	-1.27	-2.33	-3.14	-0.45	-1.2	-0.83	-1.98	-2.26	-0.94	-1.08	-3
OXP	-1.33	-1.82	-1.24	-1.8	-3.83	-1.39	-1.07	-0.51	-0.68	-1.89	-2.9	-1.77	-4.17
QXY	-1.47	-0.74	-0.99	-2.12	-3.14	-1.48	-1.56	-0.9	-1.17	-2.46	-0.86	-1.35	-1.99
WBP	-1.54	-1.87	-1.72	-2.26	-3.14	-1.84	-2.37	-0.97	-0.44	-1.53	-1.89	-2.04	-inf
