# Supplementary material for: Combination of machine learning and data envelopment analysis to measure the efficiency of the Tax Service Office
Source: PeerJ Comput Sci. 2025 Feb 17;11:e2672. doi: 10.7717/peerj-cs.2672 (PMC11888853; doi:10.7717/peerj-cs.2672)
Supplement: Supplemental Information 21 [file peerj-cs-11-2672-s021.xlsx]

## Sheet: Sheet1
Column	Unit	Description
DMU	-	Masked tax serivice office code Number of Treasury Taxpayers Number of corporate taxpayers
Vin1 Vin2	taxpayer taxpayer
Vin3	taxpayer Number of individual taxpayers (employees)
Vin4 Vin5 Vin6 Vin7	taxpayer Number of non-employee taxpayers employee Number of Tax Auditors employee Number of Account Representatives Rupiah Budget realization amount
Vout1	percent Compliance rate of annual tax return submission
Vout2	percent Percentage of revenue achievement
Vout3	percent Percentage of revenue growth achievement
Vout4	letter Number of issued tax advisories.
Vout5	letter Number of tax advisories that have been paid.
Vout6	tax audit Number of completed tax audits
