# Supplementary material for: Combination of machine learning and data envelopment analysis to measure the efficiency of the Tax Service Office
Source: PeerJ Comput Sci. 2025 Feb 17;11:e2672. doi: 10.7717/peerj-cs.2672 (PMC11888853; doi:10.7717/peerj-cs.2672)
Supplement: Supplemental Information 22 [file peerj-cs-11-2672-s022.xlsx]

## Sheet: Sheet1
DMU	Vin1	Vin2	Vin3 Vin4 Vin5 Vin6 Vin7 Vout1 Vout2 Vout3 Vout4 Vout5 Vout6
CQL	36	4297	31733 4922 7 30 7211834457 1.0306 138.82 20.07 1463 1786 185
EXA	50	6610	46783 10206 21 35 9785803301 1.0484 119.84 -13.67 2839 2243 586
WOO	43	6970	41693 6421 14 34 9611797295 1.1838 147.61 128.02 1741 1694 362
≈	≈	≈	≈ ≈ ≈ ≈ ≈ ≈ ≈ ≈ ≈ ≈ ≈
CTF	340	3254	34840 5521 5 38 11050730170 1.0671 112.16 10.94 1936 1803 191
OXP	1318	3875	35837 9399 4 21 11796098687 1.1812 138.03 25.42 422 949 129
QXY	1152	10768	45836 6822 5 20 9468831859 1.0456 124.17 5 2084 1394 349
WBP	1067	3685	22239 5952 5 17 7452757395 1.025 147.5 46.41 855 748 101
