# Supplementary material for: Combination of machine learning and data envelopment analysis to measure the efficiency of the Tax Service Office
Source: PeerJ Comput Sci. 2025 Feb 17;11:e2672. doi: 10.7717/peerj-cs.2672 (PMC11888853; doi:10.7717/peerj-cs.2672)
Supplement: Supplemental Information 23 [file peerj-cs-11-2672-s023.xlsx]

## Sheet: Sheet1
ID	Vin1	Vin2	Vin3	Vin4	Vin5	Vin6	Vin7	Vout1	Vout2	Vout3	Vout4	Vout5	Vout6
CQL	-0.75	-0.5	-0.25	-0.81	-0.86	-0.21	-1.09	-0.1	1.04	-0.54	-0.04	0.59	-1.04
EXA	-0.72	0.16	0.32	-0.29	0.7	0.48	-0.14	0.14	-0.44	-1.46	1.63	1.22	1.41
WOO	-0.73	0.26	0.12	-0.66	-0.08	0.34	-0.2	1.99	1.73	2.4	0.3	0.47	0.05
≈	≈	≈	≈	≈	≈	≈	≈	≈	≈	≈	≈	≈	≈
CTF	-0.15	-0.8	-0.13	-0.75	-1.08	0.89	0.33	0.4	-1.04	-0.79	0.53	0.62	-1
OXP	1.78	-0.62	-0.1	-0.37	-1.19	-1.45	0.61	1.96	0.98	-0.4	-1.31	-0.55	-1.38
QXY	1.45	1.35	0.28	-0.62	-1.08	-1.59	-0.26	0.1	-0.1	-0.95	0.71	0.06	-0.03
WBP	1.28	-0.68	-0.61	-0.71	-1.08	-2	-1	-0.18	1.72	0.18	-0.78	-0.82	-1.55
