# Supplementary material for: Combination of machine learning and data envelopment analysis to measure the efficiency of the Tax Service Office
Source: PeerJ Comput Sci. 2025 Feb 17;11:e2672. doi: 10.7717/peerj-cs.2672 (PMC11888853; doi:10.7717/peerj-cs.2672)
Supplement: Supplemental Information 38 [file peerj-cs-11-2672-s038.xlsx]

## Sheet: Sheet1
KD_KPP	WP_BENDAHARA	WP_BADAN	WP_OP_KARYAWAN	WP_OP_PENGUSAHA	JUMLAH_FPP	JUMLAH_AR	REALISASI_ANGGARAN	KEPATUHAN_SPT	CAPAIAN_PENERIMAAN	PERTUMBUHAN_PENERIMAAN	SP2DK_TERBIT	SP2DK_CAIR	PEMERIKSAAN_SELESAI	EFISIENSI_IO	EFISIENSI_OO	EF_IO	EF_OO
1	0.00720721	0.181703	0.256225	0.0864388	0.0869565	0.454545	0.0797759	0.386392	0.517923	0.133634	0.286094	0.337522	0.0464345	1	1	1	1
2	0.01001	0.28672	0.377745	0.179235	0.391304	0.568182	0.227278	0.411466	0.247937	0.0263835	0.591262	0.428685	0.268104	1	1	0.955113	0.946225
3	0.00860861	0.303065	0.336647	0.112764	0.23913	0.545455	0.217306	0.602197	0.642959	0.476779	0.347749	0.31917	0.144279	1	1	1	1
4	0.0134134	0.223564	0.549415	0.212093	0.23913	0.568182	0.208055	0.394422	0.345661	0.262659	0.358173	0.288849	0.0956329	1	1	0.722341	0.746212
5	0.0218218	0.206402	0.461461	0.0807488	0.23913	0.590909	0.212895	0.494999	0.612945	0.321212	0.466844	0.448235	0.102819	1	1	1	1
7	0.0002002	0.0370942	0.00111427	0.000772716	0.586957	0.454545	0.143452	0.343288	0.200711	0.129915	0.107119	0.0650309	0.0652294	1	1	1	1
8	0.00940941	0.243678	0.402009	0.115381	0.23913	0.522727	0.293945	0.379631	0.263585	0.143552	0.438235	0.451825	0.187396	1	1	1	1
9	0.0384384	0.342701	0.818124	0.285431	0.217391	0.704545	0.269701	0.653754	1	0.853142	0.552451	0.627768	0.129353	1	1	1	1
11	0.00780781	0.400182	0.0606711	0.0298198	0.456522	0.5	0.269651	0.491055	0.415505	0.514829	0.37902	0.354877	0.145937	1	1	1	1
12	0.0402402	0.492304	0.0794603	0.032296	0.391304	0.318182	0.109114	0.240456	0.432432	0.262341	0.101575	0.0762019	0.285793	1	1	1	1
13	0.00680681	0.478683	0.370034	0.133083	0.391304	0.568182	0.259687	0.27201	0.155619	0.27744	0.243957	0.241572	0.232725	1	1	0.749266	0.688348
15	0.0046046	0.464291	0.311834	0.0971339	0.391304	0.5	0.559209	0.351176	0.12276	0.111065	0.163229	0.252942	0.197899	1	1	0.811764	0.73301
16	0.00580581	0.370352	0.287627	0.103245	0.391304	0.613636	0.28689	0.273278	0.421622	0.169681	0.247949	0.179733	0.187949	1	1	0.660787	0.692987
17	0.0126126	0.462157	0.384633	0.0769204	0.391304	0.545455	0.394701	0.345964	0.604125	0.321116	0.461521	0.270696	0.239359	1	1	1	1
19	0.00600601	0.272645	0.14215	0.060588	0.369565	0.431818	0.248873	0.296662	0.405832	0.440415	0.203593	0.230002	0.111111	1	1	0.850633	0.853707
21	0.0104104	0.108513	0.0235773	0.0107653	0.23913	0.318182	0.0948526	0.380335	0.835562	0.41988	0.180971	0.0748055	0.0381426	1	1	1	1
22	0.000600601	0.198956	0.0371019	0.0134347	0.304348	0.363636	0.214228	0.353712	0.118208	0.245176	0.10224	0.0903651	0.100608	1	1	1	1
25	0.0640641	0.0813167	0.03472	0.0227424	0.23913	0.318182	0	0.30624	0.750498	0.674878	0.0703038	0.0428885	0.0431177	1	1	1	1
26	0.0048048	0.18479	0.0638686	0.0562151	0.23913	0.340909	0.120646	0.246232	0.209246	0.406052	0.255933	0.101137	0.142067	1	1	1	1
27	0.00900901	0.293939	0.256024	0.1272	0.23913	0.545455	0.364537	0.132272	0.595875	0.370196	0.390552	0.289048	0.211719	1	1	0.976557	0.985998
28	0.0126126	0.203995	0.0581762	0.0335253	0.391304	0.295455	0.0200727	0.303564	0.555334	0.194602	0.191395	0.187712	0.140409	1	1	1	1
29	0.0036036	0.137571	0.0585637	0.0338766	0.23913	0.318182	0.464076	0.352726	0.136842	0.496106	0.0556664	0.138241	0.116086	1	1	1	1
31	0.0048048	0.225153	0.298794	0.167785	0.217391	0.409091	0.120926	0.351176	0.636273	0.336025	0.410291	0.232396	0.139303	1	1	1	1
32	0.0048048	0.255891	0.13146	0.145956	0.391304	0.454545	0.204328	0.749965	0.182219	0.473601	0.328232	0.46918	0.148701	1	1	1	1
33	0.0046046	0.119274	0.243096	0.308665	0.23913	0.409091	0.169076	0.377236	0.250356	0.466639	0.130184	0.315779	0.106136	1	1	1	1
34	0.00560561	0.44336	0.494663	0.328071	0.391304	0.568182	0.24453	0.37301	0.316785	0.324359	0.473719	1	0.199005	1	1	1	1
35	0.003003	0.160454	0.169304	0.0967827	0.23913	0.5	0.211476	0.476123	0.288336	0.159446	0.32668	0.387393	0.107794	1	1	1	1
36	0.00740741	0.426969	0.347305	0.323522	0.391304	0.590909	0.296157	0.427525	0.308677	0.572777	0.552229	0.565929	0.258154	1	1	1	1
38	0.0002002	0.0932577	0.000960855	0.000772716	0.586957	0.681818	0.214737	0.333146	0.175533	0.128834	0.179641	0.129663	0.10503	1	1	1	1
39	0.0018018	0.17126	0.164896	0.11531	0.23913	0.386364	0.182375	0.719115	0.236842	0.445914	0.305833	0.211849	0.128248	1	1	1	1
43	0.0036036	0.433462	0.257025	0.131924	0.391304	0.522727	0.296611	0.382167	0.266572	0.351473	0.174762	0.196689	0.229409	1	1	0.824091	0.792217
46	0.0002002	0.0411351	0.000686325	0.000737593	0.586957	0.568182	0.156934	0.34202	0.285775	0.184113	0.1222	0.0873728	0.0646766	1	1	1	1
47	0.0016016	0.406356	0.161157	0.179463	0.543478	0.590909	0.29706	0.39245	0.228023	0.425729	0.500111	0.220826	0.205638	1	1	1	1
51	0.0002002	0	0	0	0.586957	0.568182	0.246386	0.343288	0.181792	0.314695	0	0	0.143173	1	1	1	1
52	0.0002002	0.0157548	0	0	1	0.522727	0.29201	0.343288	0.140967	0.135605	0.0842759	0.0355077	0.290216	1	1	1	1
53	0.0002002	0.0650624	0.0819069	0.00110639	0.565217	1	0.431895	0.343288	0.212233	0.154773	0.0694167	0.0335129	1	1	1	1	1
54	0.0002002	0.0429512	0	0	0.695652	0.590909	0.258647	0.341175	0.159033	0.117677	0.0765136	0.0901656	0.123825	1	1	1	1
55	0.0002002	0.0142565	0	0	1	0.5	0.560832	0.343288	0.221195	0.188404	0.0858283	0.0935568	0.396352	1	1	1	1
56	0.0002002	0.00671964	0	0	0.630435	0.5	0.331043	0.343288	0.182788	0.169618	0.0785096	0.0223419	0.092869	1	1	1	1
57	0.0004004	0.0133485	0	0	1	0.5	0.41988	0.343288	0.118919	0.145523	0.0523398	0.0225414	0.353234	1	1	1	1
58	0.0002002	0.0186152	0	0	0.847826	0.5	0.294513	0.343288	0.181508	0.0910073	0.0685296	0.0570517	0.197347	1	1	1	1
59	0.0002002	0.0193871	0	0	0.695652	0.522727	0.303559	0.343288	0.221337	0.141295	0.0707474	0.042689	0.116086	1	1	1	1
61	0.0102102	0.327946	0.218558	0.0762179	0.391304	0.522727	0.197671	0.446119	0.397155	0.218125	0.129741	0.343906	0.110558	1	1	0.839586	0.883222
62	0.0002002	0.0623837	0.00148569	0.000825401	0.586957	0.590909	0.159052	0.342302	0.102134	0.109825	0.0958084	0.0670257	0.185738	1	1	1	1
63	0.015015	0.500795	0.0296089	0.0118893	0.543478	0.545455	0.229958	0.391464	0.509531	0.150259	0.156576	0.203072	0.198452	1	1	1	1
66	0.0032032	0.0894892	0.267223	0.0813986	0.173913	0.522727	0.225251	0.357093	0.203983	0.193935	0.0893768	0.0927588	0.0784964	1	1	1	1
68	0.00640641	0.117049	0.311648	0.046644	0.152174	0.340909	0.244452	0.399915	0.416785	0.163673	0.209359	0.111909	0.0751797	1	1	1	1
69	0.0004004	0.0597049	0.00141302	0.000632222	0.586957	0.568182	0.234453	0.343288	0.0401138	0.194094	0.0898204	0.0582486	0.173577	1	1	0.969363	0.991764
71	0.00760761	0.20118	0.0953427	0.0367391	0.304348	0.431818	0.981571	0.136498	0.220626	1	0.050122	0.0400958	0.111111	1	1	1	1
72	0.0044044	0.186742	0.102852	0.0922166	0.304348	0.477273	0.327202	0.393154	0.38293	0.40157	0.411178	0.263515	0.112217	1	1	0.951944	0.965169
73	0.0002002	0.103156	0.000758995	0.000772716	0.804348	0.681818	0.218091	0.331173	0.234139	0.207572	0.188512	0.113106	0.334439	1	1	1	1
75	0.0106106	0.0734166	0.0703604	0.0661726	0.23913	0.363636	0.313409	0.406254	0.705121	0.50062	0.201597	0.143028	0.0972913	1	1	1	1
76	0.0018018	0.110193	0.0126365	0.00820133	0.23913	0.363636	0.0898464	0.457529	0.460597	0.542166	0.204258	0.122881	0.0497512	1	1	1	1
77	0.0342342	0.205812	0.0560526	0.0249903	0.369565	0.5	0.10604	0.395267	0.543101	0.254871	0.381016	0.253541	0.117745	1	1	1	1
78	0.0004004	0.089353	0.00155029	0.00175617	0.695652	0.681818	0.334986	0.336667	0.233144	0.127436	0.267687	0.144225	0.284688	1	1	1	1
81	0.0002002	0.030874	8.07441e-06	0.000280988	1	0.681818	0.431166	0.343288	0.173115	0.199816	0.0645376	0.0295232	0.187396	1	1	0.994121	0.999886
85	0.0038038	0.262338	0.434169	0.184328	0.23913	0.636364	0.218359	0.351881	0.274395	0.343685	0.40031	0.3846	0.0945274	1	1	0.96511	0.965843
86	0.00900901	0.335074	0.33684	0.125303	0.391304	0.545455	0.193024	0.506268	0.109815	0.399377	0.838323	0.56154	0.185185	1	1	1	1
91	0	0.0139387	0	0	0.586957	0.454545	0.221114	0.336667	0.0846373	0.254013	0.0106454	0.0390983	0.226092	1	1	1	1
92	0.0002002	0.00503973	0	0	0.586957	0.454545	0.240619	0.343288	0.134282	0.175943	0.0199601	0.000398963	0.148701	1	1	1	1
97	0.0004004	0.0346879	0.00100123	0.000737593	0.586957	0.454545	0.880768	0.343288	0.167852	0.179217	0.129519	0.124077	0.124378	1	1	1	1
98	0.0004004	0.0394098	0.000734772	0.000491728	0.586957	0.431818	0.192387	0.343288	0.2734	0.166439	0.0856066	0.0514662	0.0740741	1	1	1	1
101	0.0796797	0.427242	0.366473	0.159197	0.195652	0.590909	0.53011	0.379913	0.486486	0.178423	0.745398	0.395572	0.175788	1	1	1	1
103	0.196396	0.181476	0.305197	0.238734	0.0434783	0.227273	0.159667	0.487674	0.118919	0.351155	0.189621	0.133653	0.000552792	1	1	1	1
112	0.00680681	0.137934	0.278777	0.15853	0.0869565	0.568182	0.144105	0.35343	0.325605	0.416351	0.255489	0.1925	0.0375898	1	1	1	1
113	0.00780781	0.219205	0.291527	0.231692	0.152174	0.522727	0.115106	0.351035	0.142817	0.448361	0.207363	0.189707	0.114981	1	1	1	1
114	0.102703	0.135301	0.159316	0.220751	0.0652174	0.204545	0.159438	0.36484	0.370839	0.263263	0.277223	0.202873	0.0702045	1	1	1	1
117	0.127127	0.224336	0.574462	0.390046	0.217391	0.5	0.203308	0.123539	0.243528	0.251979	0.365048	0.368642	0.151465	1	1	0.707634	0.753761
124	0.02002	0.311873	0.312068	0.237593	0.23913	0.613636	0.165031	0.349486	0.262873	0.237515	0.161011	0.211051	0.173577	1	1	0.59647	0.682004
126	0.314515	0.159501	0.470528	0.264005	0.0434783	0.568182	0.301733	0.377095	0.325889	0.129279	0.220226	0.187712	0.0889994	1	1	0.526345	0.69993
129	0.0004004	0.0783655	0.00054906	0.00196691	0.521739	0.704545	0.201691	0.343288	0.312945	0.239804	0.249723	0.215839	0.0641238	1	1	1	1
202	0.134735	0.269194	0.542488	0.465948	0.0652174	0.477273	0.309809	0.401183	0.0871977	0.102324	0.297627	0.122881	0.137092	1	1	0.689394	0.633556
203	0.127928	0.341112	0.3685	0.510502	0.0869565	0.477273	0.289327	0.466122	0.215789	0.1549	0.328676	0.182326	0.127142	1	1	0.633576	0.689793
211	0.03003	0.327401	0.339012	0.247673	0.369565	0.545455	0.129643	0.0812791	0.427169	0.161448	0.846529	0.271893	0.175235	1	1	1	1
212	0.0998999	0.268831	0.383543	0.356802	0.217391	0.5	0.279715	0.360614	0.177952	0.302711	0.795077	0.309196	0.0889994	1	1	0.95192	0.982156
214	0.110911	0.257843	0.268749	0.188016	0.0434783	0.272727	0.164667	0.375687	0.432575	0.274007	0.266356	0.324556	0.106689	1	1	1	1
215	0.0272272	0.398774	0.42989	0.253047	0.23913	0.386364	0.181952	0.359487	0.342817	0.362949	0.261477	0.486336	0.0950802	1	1	0.978223	0.972558
216	0.0374374	0.649444	0.538467	0.319413	0.391304	0.590909	0.270796	0.0126778	0.531437	0.217934	0.671324	0.398364	0.271421	1	1	0.996042	0.998746
218	0.0002002	0.0322815	0.000339125	0.00159812	0.543478	0.272727	0.227037	0.343288	0.232432	0.140024	0.237525	0.127668	0.0486457	1	1	1	1
219	0.0808809	0.317367	0.396074	0.350936	0.217391	0.659091	0.393281	0.366108	0.258606	0.109698	0.909736	0.358867	0.124931	1	1	1	1
222	0.0858859	0.263337	0.352666	0.361596	0.23913	0.545455	0.245595	0.436259	0.42276	0.14031	0.509869	0.399362	0.117192	1	1	0.758732	0.840507
223	0.026026	0.0846765	0.146236	0.171016	0.0434783	0.181818	0.242504	0.385688	0.415647	0.218125	0.0428033	0.0410932	0.0519624	1	1	1	1
224	0.0618619	0.127401	0.189087	0.132275	0.0434783	0.159091	0.0768453	0.375828	0.234424	0.186338	0.187403	0.167165	0.0359315	1	1	1	1
225	0.0214214	0.590647	0.607648	0.263461	0.23913	0.431818	0.206331	0.359346	0.27724	0.266061	0.181415	0.577499	0.167496	1	1	0.963613	0.956623
305	0.0532533	0.136935	0.178986	0.162903	0.0869565	0.159091	0.102045	0.404705	0.3101	0.146826	0.169882	0.0903651	0.0878939	1	1	1	1
307	0.033033	0.379932	0.530893	0.351533	0.217391	0.477273	0.0697578	0.353571	0.25633	0.16539	0.0964737	0.0666268	0.105583	1	1	0.557014	0.773948
309	0.151752	0.163768	0.279367	0.284008	0.0217391	0.25	0.238251	0.460065	0.52845	0.275311	0.0915946	0.095751	0.0348259	1	1	1	1
311	0.208609	0.234415	0.45597	0.436286	0.23913	0.295455	0.299423	0.633188	0.331863	0.149242	0.157685	0.170956	0.134881	1	1	0.740204	0.915452
313	0.113313	0.242225	0.324567	0.457307	0.23913	0.681818	0.233235	0.543739	0.273542	0.168696	0.335995	0.260922	0.107242	1	1	0.576248	0.759588
321	0.265065	0.385289	0.609344	0.775245	0.23913	0.568182	0.236187	0.628821	0.301849	0.10439	0.27811	0.325354	0.243228	1	1	0.773992	0.916983
326	0.344945	0.359183	0.418101	0.891767	0.0869565	0.659091	0.425557	0.542893	0.463158	0.133157	0.280994	0.282865	0.158651	1	1	0.597729	0.8529
327	0.126326	0.0737798	0.167261	0.215447	0.0652174	0.113636	0.0738639	0.63023	0.286629	0.124543	0.225771	0.146818	0.0613599	1	1	1	1
328	0.181582	0.230602	0.359578	0.424976	0.23913	0.363636	0.172747	0.495281	0.376956	0.211037	0.267243	0.616597	0.116086	1	1	1	1
329	0.0004004	0.0621112	0.00176022	0.00505778	0.434783	0.613636	0.160883	0.343288	0.0714083	0.0925014	0.125749	0.0931578	0.0608071	1	1	1	1
334	0.0718719	0.128717	0.162457	0.23041	0.0434783	0.227273	0.113998	0.4919	0.114367	0.114816	0.105345	0.0436864	0.00829187	1	1	1	1
401	0.0674675	0.391827	0.501809	0.287854	0.217391	0.454545	0.267201	0.383857	0.803414	0.193204	0.182524	0.185119	0.105583	1	1	0.752428	0.887559
406	0.155756	0.459115	0.243637	0.391574	0.0869565	0.5	0.212189	0.355402	0.275676	0.124162	0.284986	0.137243	0.0801548	1	1	0.589607	0.59334
408	0.0906907	0.537208	0.930899	0.645429	0.369565	0.909091	0.311156	0.401042	0.6	0.0882736	0.826791	0.398963	0.230514	1	1	1	1
409	0.0598599	0.321725	0.328879	0.431439	0.0652174	0.613636	0.189031	0.367939	0.168421	0.107187	0.37281	0.240176	0.0917634	1	1	0.899893	0.823801
411	0.0106106	0.486629	0.334006	0.10753	0.391304	0.613636	0.322625	0.357515	0.502703	0.212022	0.330894	0.269898	0.245439	1	1	0.727111	0.830508
412	0.0114114	0.37916	0.61485	0.125127	0.23913	0.659091	0.200759	0.373292	0.329018	0.262119	0.49124	0.444444	0.234936	1	1	0.991363	0.995184
413	0.0242242	0.574347	0.667358	0.270222	0.369565	0.909091	0.354229	0.349768	0.334424	0.181888	0.541583	0.434071	0.393035	1	1	0.776515	0.922344
415	0.0002002	0.061748	0.00134035	0.00110639	0.586957	0.681818	0.762151	0.343288	0.0691323	0.117296	0.189843	0.164772	0.105583	1	1	0.996621	0.999783
416	0.0208208	0.715278	0.820627	0.526026	0.391304	0.772727	0.348471	0.350613	0.337838	0.199911	0.741628	0.400758	0.263682	1	1	1	1
417	0.0292292	0.292849	0.255919	0.107952	0.23913	0.613636	0.214296	0.387801	0.236415	0.143997	0.28432	0.317375	0.281924	1	1	0.761166	0.842767
431	0.0002002	0.061521	0.00146954	0.000632222	0.695652	0.522727	0.145543	0.343288	0.289474	0.158492	0.142825	0.0835827	0.160862	1	1	1	1
436	0.0194194	0.261112	0.449713	0.245671	0.152174	0.590909	0.222466	0.411466	0.314367	0.111828	0.243735	0.182924	0.0873411	1	1	0.612014	0.734135
439	0.0814815	0.128627	0.193899	0.0610094	0.0869565	0.386364	0.151992	0.638822	0.435277	0.0841095	0.136837	0.0989427	0.0508568	1	1	1	1
442	0.14014	0.466606	0.433636	0.363703	0.0869565	0.681818	0.296726	0.39245	0.479943	0.0950761	0.465513	0.301217	0.121614	1	1	0.74533	0.841714
443	0.10971	0.657435	0.862364	0.702206	0.0869565	0.727273	0.275132	0.464995	0.261451	0.109635	0.558439	0.50788	0.113875	1	1	1	1
444	0.0518519	0.407628	0.444327	0.333269	0.0869565	0.363636	0.238581	0.359065	0.206117	0.202168	0.140829	0.151606	0.0995025	1	1	0.677774	0.698413
447	0.00880881	0.510511	0.732503	0.28803	0.152174	0.681818	0.620711	0.35174	0.404694	0.140119	0.651142	0.418512	0.124931	1	1	1	1
448	0.012012	0.42706	0.555132	0.254171	0.152174	0.613636	0.513596	0.357656	0.413087	0.205696	0.379685	0.262318	0.222222	1	1	0.91452	0.96097
449	0	0.086765	0.00118694	0.00145762	0.586957	0.590909	0.216826	0.325539	0.253343	0.124543	0.157685	0.166367	0.144831	1	1	1	1
451	0.0578579	1	0.925522	0.244319	0.543478	0.772727	1	0.213974	0.361735	0.174767	0.450432	0.28087	0.386954	1	1	0.694645	0.822518
453	0.00860861	0.558048	0.736039	0.211584	0.391304	0.75	0.31555	0.577969	0.492745	0.13694	0.348858	0.371035	0.374793	1	1	1	1
456	0.0004004	0.0740522	0.000855888	0.000544414	0.586957	0.681818	0.351913	0.342302	0.0652916	0.141136	0.227545	0.224018	0.1288	1	1	1	1
457	0.0004004	0.0628831	0.000839739	0.00159812	0.695652	0.5	0.296601	0.343288	0.169559	0.238946	0.124196	0.108518	0.232172	1	1	0.974368	0.995039
459	0.0004004	0.0886266	0.000863962	0.00121176	0.543478	0.522727	0.904726	0.343288	0.119061	0.152834	0.351076	0.203072	0.120509	1	1	1	1
503	0.0182182	0.335392	0.257493	0.138123	0.304348	0.75	0.211421	0.378081	0.367283	0.221399	0.385673	0.257929	0.228856	1	1	0.66053	0.793283
504	0.00580581	0.116549	0.0968768	0.100155	0.304348	0.409091	0.435335	0.363431	0.0135135	0.0702502	0.238412	0.14622	0.123825	1	1	0.857433	0.795541
505	0.0904905	0.28563	0.404189	0.262671	0.23913	0.522727	0.241026	0.356388	0.239687	0.146127	0.265469	0.356473	0.270315	1	1	0.698237	0.778437
506	0.0498498	0.200045	0.286262	0.203172	0.130435	0.613636	0.222616	0.356529	0.481366	0.219715	0.378133	0.52304	0.259259	1	1	1	1
507	0.206006	0.394688	0.341677	0.643989	0.152174	0.613636	0.322638	0.383293	0.142817	0.140151	0.281437	0.437263	0.205086	1	1	0.628706	0.782368
508	0.012012	0.063882	0.0455478	0.0305047	0.0869565	0.227273	0.0186152	0.382167	0.202276	0.161893	0.115103	0.104129	0.0353787	1	1	1	1
509	0.0156156	0.109103	0.0345262	0.0653121	0.23913	0.295455	0.0592172	0.450345	0.233144	0.149178	0.0933688	0.108318	0.0823659	1	1	1	1
515	0.0826827	0.189194	0.147705	0.249166	0.0869565	0.25	0.108819	0.63361	0.208393	0.175149	0.113772	0.122482	0.042565	1	1	1	1
516	0.0738739	0.21294	0.16215	0.0689649	0.0869565	0.295455	0.141917	0.381321	0.111522	0.112782	0.268574	0.370636	0.223881	1	1	1	1
517	0.0156156	0.301703	0.299302	0.0946753	0.23913	0.681818	0.225238	0.350754	0.274395	0.195048	0.297183	0.294833	0.215036	1	1	0.766097	0.779881
518	0.00500501	0.238093	0.167342	0.115521	0.0869565	0.454545	0.0873754	0.396676	0.30441	0.221526	0.303837	0.361859	0.189055	1	1	1	1
522	0.108909	0.362134	0.382864	0.440483	0.23913	0.477273	0.288347	0.543598	0.16771	0.166407	0.164782	0.226212	0.296296	1	1	0.794207	0.861876
523	0.246446	0.390238	0.473476	0.427505	0.0869565	0.795455	0.195289	0.397943	0.320199	0.149909	0.303615	0.329144	0.216694	1	1	0.69638	0.807443
524	0.140541	0.263428	0.463132	0.276123	0.108696	0.431818	0.295437	0.377518	0.330299	0.187514	0.147039	0.201277	0.231067	1	1	0.753992	0.799888
525	0.137938	0.196232	0.412651	0.149924	0.0869565	0.386364	0.191693	0.674179	0.264011	0.140627	0.358173	0.405945	0.115533	1	1	1	1
526	0.0458458	0.279637	0.351512	0.286888	0.23913	0.590909	0.264857	0.378363	0.197866	0.302235	0.2943	0.385398	0.25152	1	1	0.784823	0.820674
529	0.174374	0.316776	0.38322	0.364898	0.0869565	0.5	0.236395	0.467672	0.424751	0.136813	0.239299	0.262916	0.225539	1	1	0.787075	0.868931
533	0.25986	0.340795	0.428469	0.493449	0.0869565	0.568182	0.242477	0.42992	0.51138	0.159541	0.315813	0.277878	0.157546	1	1	0.664117	0.856634
541	0.0532533	0.338161	0.327442	0.24402	0.23913	0.590909	0.22426	0.380617	0.0863442	0.113259	0.245287	0.478755	0.266998	1	1	0.762728	0.83795
543	0.0544545	0.37185	0.455042	0.456148	0.0869565	0.454545	0.172886	0.386815	0.1101	0.111288	0.257263	0.407939	0.135987	1	1	0.953752	0.967903
601	0.122122	0.347378	0.314773	0.358874	0.0869565	0.477273	0.112565	0.357938	0.699573	0.144982	0.454646	0.232795	0.171365	1	1	1	1
602	0.105706	0.359728	0.525273	0.314021	0.152174	0.431818	0.256688	0.359769	0.414936	0.239963	0.321357	0.265709	0.23162	1	1	0.855098	0.863938
604	0.00580581	0.387469	0.331616	0.262003	0.23913	0.590909	0.182321	0.376109	0.248506	0.36511	0.499446	0.383004	0.243228	1	1	1	1
605	0.0128128	0.0849489	0.0769088	0.0330161	0.23913	0.272727	0.0166194	0.3616	0.162447	0.155631	0.139721	0.106523	0.050304	1	1	1	1
606	0.0124124	0.330897	0.256403	0.163447	0.23913	0.454545	0.148712	0.363009	0.246373	0.235831	0.453316	0.173349	0.243781	1	1	1	1
607	0.0036036	0.0991146	0.0796137	0.0501212	0.152174	0.295455	0.0129745	0.403578	0.157041	0.221622	0.121535	0.0632356	0.0519624	1	1	1	1
608	0.149149	0.39605	0.363922	0.349988	0.0869565	0.522727	0.174186	0.385266	0.482077	0.166916	0.420271	0.344704	0.0867883	1	1	0.745346	0.837617
609	0.0336336	0.343746	0.321668	0.109954	0.304348	0.681818	0.151481	0.392872	0.429872	0.237802	0.404081	0.290844	0.222222	1	1	0.805123	0.882942
613	0.0036036	0.111419	0.0392013	0.0545994	0.217391	0.272727	0.0206369	0.368925	0.244808	0.27744	0.231315	0.0997407	0.0619127	1	1	1	1
615	0.003003	0.287855	0.26627	0.141231	0.23913	0.545455	0.137708	0.418087	0.204694	0.112337	0.507651	0.313984	0.26921	1	1	1	1
618	0.00600601	0.266515	0.200472	0.119156	0.23913	0.5	0.209255	0.369489	0.199573	0.440097	0.776225	0.344504	0.16031	1	1	1	1
619	0.0144144	0.37403	0.415041	0.359682	0.23913	0.636364	0.157065	0.357797	0.143101	0.573445	0.452207	0.217036	0.28911	1	1	1	1
621	0.0858859	0.297753	0.444222	0.326332	0.0869565	0.363636	0.19471	0.344556	0.357183	0.170094	0.229763	0.276282	0.233831	1	1	1	1
622	0.0534535	0.180204	0.24392	0.125742	0.0652174	0.363636	0.0803839	0.45598	0.255192	0.190057	0.362165	0.297227	0.1089	1	1	1	1
623	0.0414414	0.21798	0.29625	0.233676	0.23913	0.477273	0.146763	0.360473	0.253485	0.266792	0.205367	0.2691	0.241017	1	1	0.844313	0.86084
626	0.0834835	0.381476	0.686947	0.549752	0.0869565	0.522727	0.229516	0.380476	0.309673	0.233415	0.235307	0.302414	0.101714	1	1	0.684595	0.744898
628	0.025025	0.0855846	0.0761902	0.149169	0.0869565	0.227273	0.00992494	0.349204	0.469275	0.21466	0.124418	0.159585	0.0718629	1	1	1	1
629	0.135936	0.44622	0.557215	0.513505	0.0869565	0.5	0.260528	0.353289	0.299858	0.14476	0.571967	0.383004	0.240464	1	1	0.959606	0.976214
631	0.0002002	0.0654711	0.00102545	0.00117664	0.586957	0.704545	0.133033	0.343288	0.0908962	0.0112527	0.233311	0.148215	0.0845771	1	1	1	1
636	0.0004004	0.0957094	0.000427944	0.00152787	0.543478	0.681818	0.324834	0.343288	0.116501	0.123208	0.154358	0.140634	0.154229	1	1	1	1
642	0.103103	0.56504	0.633874	0.409153	0.304348	0.636364	0.217585	0.351176	0.234424	0.132077	0.458417	0.363654	0.314538	1	1	0.741875	0.791536
643	0.027027	0.411033	0.312149	0.220523	0.304348	0.522727	0.99999	0.353712	0.299147	0.201405	0.341983	0.377219	0.163074	1	1	0.708719	0.69491
644	0.122923	0.374756	0.427476	0.447754	0.0869565	0.409091	0.129875	0.344837	0.632575	0.214692	0.140164	0.125873	0.11885	1	1	0.834347	0.889904
646	0.121722	0.290851	0.552476	0.475501	0.0869565	0.590909	0.155782	0.352585	0.370839	0.138053	0.482812	0.311789	0.144831	1	1	0.759311	0.836383
647	0.12993	0.315959	0.295879	0.337712	0.0869565	0.477273	0.164887	0.355966	0.508677	0.181156	0.610778	0.33832	0.178552	1	1	1	1
651	0.0002002	0.0691487	0.00120309	0.0038109	0.586957	0.681818	0.249679	0.342443	0.0200569	0.0119521	0.286538	0.226411	0.139856	1	1	1	1
652	0.0204204	0.228785	0.391197	0.186804	0.0869565	0.318182	0.14274	0.356529	0.180939	0.107028	0.123752	0.257331	0.167496	1	1	1	1
653	0.115115	0.327219	0.41207	0.428454	0.0869565	0.340909	0.172648	0.377659	0.209388	0.155409	0.658461	0.461999	0.176893	1	1	1	1
655	0.292893	0.602497	0.454614	0.517948	0.0869565	0.590909	0.223392	0.522468	0.401138	0.180457	0.59104	0.536605	0.244887	1	1	1	1
706	0.23023	0.291532	0.347369	0.283376	0.0434783	0.295455	0.247141	0.349768	0.12091	0.100671	0.209803	0.490126	0.0143726	1	1	1	1
714	0.162362	0.15269	0.281458	0.223842	0.0434783	0.25	0.184404	0.385406	0.690612	0.24613	0.155689	0.134051	0.0608071	1	1	1	1
721	0.0252252	0.445176	0.33986	0.193934	0.23913	0.5	0.158258	0.196647	0.992319	0.342827	0.371479	0.277878	0.262576	1	1	1	1
724	0.0742743	0.32849	0.41362	0.152963	0.217391	0.659091	0.255277	0.465136	0.998151	0.175816	0.294079	0.328945	0.161968	1	1	1	1
725	0.0002002	0.0797276	0.00130806	0.00172105	0.543478	0.522727	0.191908	0.343288	0.483499	0.473855	0.272344	0.229803	0.107242	1	1	1	1
726	0.130931	0.197276	0.237509	0.226125	0.0869565	0.318182	0.194367	0.368362	0.863016	0.208843	0.0243957	0.0861759	0.0674406	1	1	1	1
727	0.162963	0.321498	0.402453	0.275561	0.195652	0.477273	0.391199	0.697704	0.705832	0.236339	0.134841	0.132655	0.0585959	1	1	0.99854	0.999642
728	0.158959	0.359818	0.404157	0.208598	0.23913	0.681818	0.309142	0.355402	0.860455	0.270415	0.189399	0.259126	0.214483	1	1	0.826025	0.911126
729	0.0222222	0.218252	0.43882	0.184521	0.23913	0.590909	0.643194	0.358219	0.591892	0.349375	0.178754	0.148614	0.106689	1	1	0.655405	0.709246
732	0.175375	0.409262	0.409494	0.470883	0.23913	0.590909	0.298261	0.627694	0.782219	0.298102	0.192504	0.262318	0.1288	1	1	0.938435	0.980482
734	0.118519	0.180341	0.362299	0.190545	0.217391	0.25	0.252005	0.44302	0.66899	0.319082	0.415391	0.275683	0.18021	1	1	1	1
735	0.216016	0.112327	0.241586	0.103439	0.0869565	0.227273	0.242932	0.379631	0.416501	0.14511	0.122644	0.140235	0.163626	1	1	0.849347	0.888521
737	0.0004004	0.0652894	0.00127576	0.00395139	0.543478	0.590909	0.320651	0.343288	0.221764	0.278426	0.222	0.206264	0.140409	1	1	1	1
741	0.0458458	0.397548	0.313465	0.181641	0.23913	0.5	0.173638	0.356811	0.873542	0.332496	0.250832	0.206264	0.259259	1	1	1	1
801	0.0382382	0.342111	0.406369	0.247287	0.23913	0.613636	0.125951	0.398507	0.32532	0.294479	0.434243	0.427688	0.20785	1	1	0.819672	0.904796
802	0.143544	0.242452	0.284268	0.262003	0.0652174	0.409091	0.35204	0.728131	0.372831	0.149528	0.266134	0.356074	0.232172	1	1	1	1
803	0.254655	0.342474	0.507727	0.481191	0.0652174	0.636364	0.364468	0.401465	0.283357	0.146413	0.586826	0.533214	0.135434	1	1	1	1
805	0.0428428	0.49244	0.48239	0.23459	0.23913	0.681818	0.152013	0.422313	0.264154	0.16024	0.82546	0.763216	0.304588	1	1	1	1
806	0.104304	0.204132	0.336929	0.390942	0.0652174	0.227273	0.135266	0.409917	0.482646	0.0861121	0.78931	0.182525	0.0619127	1	1	1	1
807	0.14034	0.293984	0.178154	0.422939	0.0652174	0.454545	0.314573	0.647556	0.438265	0.165581	0.7332	0.316178	0.101714	1	1	1	1
808	0.163564	0.315868	0.416325	0.514418	0.0652174	0.409091	0.183951	0.405268	0.354339	0.167297	0.830783	0.359864	0.141515	1	1	1	1
811	0.280681	0.545698	0.506007	0.426118	0.195652	0.727273	0.235147	0.425975	0.539545	0.271464	1	0.364652	0.127142	1	1	1	1
813	0.251251	0.170715	0.172744	0.299831	0.0434783	0.181818	0.0827319	0.425835	0.332432	0.0446613	0.605234	0.394175	0.0867883	1	1	1	1
814	0.118318	0.226652	0.229975	0.242808	0.0434783	0.227273	0.0612527	0.378504	0.324751	0.105979	0.213351	0.275484	0.0381426	1	1	1	1
815	0.161762	0.159546	0.373199	0.387763	0.0434783	0.340909	0.15258	0.723905	0.507397	0.215264	0.163894	0.0953521	0.0276396	1	1	1	1
821	0.103303	0.343428	0.47681	0.239946	0.23913	0.568182	0.344491	0.513453	0.243954	0.114276	0.258594	0.565131	0.162521	1	1	0.767737	0.863998
822	0.292292	0.231918	0.200262	0.289224	0.0652174	0.545455	0.403907	1	0.347226	0.128898	0.360612	0.398364	0.0956329	1	1	1	1
823	0.146547	0.206765	0.4779	0.515525	0.217391	0.568182	0.279077	0.582195	0.347226	0.0441527	0.70703	0.625574	0.108347	1	1	1	1
824	0.242643	0.0740522	0.236201	0.212005	0.0217391	0.431818	0.213378	0.425975	0.308393	0.139483	0.429363	0.340515	0.0757324	1	1	1	1
825	0.134935	0.0607037	0.201658	0.0719328	0	0	0.0669097	0.400761	0.541394	0.134874	0.0339321	0.121684	0.0154782	1	1	1	1
831	0.271872	0.322043	0.484618	0.4539	0.0869565	0.613636	0.429239	0.541907	0.326885	0.174735	0.323353	0.255735	0.0552792	1	1	0.491194	0.666913
832	0.137137	0.138343	0.239875	0.336061	0.0434783	0.159091	0.176274	0.3909	0.269132	0.226485	0.42892	0.402753	0.0563847	1	1	1	1
833	0.166567	0.175255	0.465498	0.267518	0.0434783	0.545455	0.218412	0.628258	0.231721	0.189453	0.266578	0.222422	0.367606	1	1	1	1
834	0.0820821	0.0641544	0.1788	0.149152	0.0434783	0.159091	0.0427612	0.449782	0.285633	0.0776248	0.106454	0.0891682	0.00773908	1	1	1	1
901	0.0316316	0.280681	0.331632	0.212462	0.23913	0.386364	0.117839	0.490069	0.715647	0.253282	0.337769	0.465789	0.179104	1	1	1	1
902	0.0492492	0.194415	0.377342	0.169998	0.0869565	0.363636	0.0214033	0.360755	0.31707	0.117359	0.169217	0.293038	0.116639	1	1	1	1
903	0.043043	0.354733	0.410237	0.231885	0.23913	0.409091	0.0464498	0.356529	0.607539	0.258209	0.275227	0.297826	0.150359	1	1	1	1
904	0.0002002	0.067378	0.000726697	0.00244108	0.456522	0.681818	0.182536	0.343288	0.230725	0.146762	0.217565	0.166168	0.103372	1	1	1	1
905	0.00780781	0.406947	0.113752	0.0916547	0.23913	0.318182	0.0589368	0.351881	0.805405	0.323596	0.424706	0.250349	0.111111	1	1	1	1
906	0.0232232	0.326947	0.269492	0.149608	0.23913	0.5	0.144283	0.349768	0.947084	0.354906	0.298958	0.264512	0.124378	1	1	1	1
908	0.0910911	0.175482	0.275564	0.383864	0.0869565	0.295455	0.147437	0.608959	0.431152	0.16628	0.144378	0.334929	0.0829187	1	1	1	1
911	0.0842843	0.304154	0.343639	0.110042	0.23913	0.409091	0.153026	0.360755	0.360882	0.14743	0.483256	0.455017	0.186844	1	1	1	1
912	0.103504	0.14647	0.177516	0.0937445	0.0652174	0.204545	0.148584	0.650092	0.55633	0.0303888	0.11599	0.132456	0.0563847	1	1	1	1
913	0.0788789	0.228104	0.154714	0.197692	0.0652174	0.318182	0.187318	0.544161	0.343812	0.117073	0.236194	0.206862	0.0762852	1	1	1	1
914	0.0758759	0.239183	0.260263	0.207931	0.0869565	0.272727	0.161339	0.378363	0.662589	0.108014	0.189843	0.303212	0.0641238	1	1	1	1
921	0.213213	0.131351	0.224097	0.196762	0.0652174	0.227273	0.171869	0.356388	0.496017	0.0857306	0.19206	0.314183	0.0270868	1	1	0.994113	0.996809
923	0.160761	0.105335	0.152219	0.0692283	0.0217391	0.204545	0.1059	0.404282	0.573257	0.0564544	0.417166	0.216637	0.0138198	1	1	1	1
924	0.21041	0.150057	0.159736	0.0602016	0.0434783	0.181818	0.0600022	0.472038	0.58478	0.230427	0.0687514	0.141033	0.0281924	1	1	1	1
926	0.235035	0.124177	0.237622	0.0845246	0.0652174	0.204545	0.0680847	0.409213	0.383642	0.101529	0.181859	0.223818	0.050304	1	1	1	1
941	0.61001	0.395959	0.964658	0.363335	0.195652	0.590909	0.799737	0.369348	0.318492	0.120665	0.759592	0.783563	0.0702045	1	1	1	1
943	0.117718	0.0989784	0.149732	0.148239	0.0434783	0.0227273	0.096369	0.389351	0.258037	0.173464	0.0401419	0.171155	0.00552792	1	1	1	1
951	0.395195	0.399955	0.50717	0.190211	0.130435	0.522727	0.50359	0.414847	0.266003	0.0749547	0.22821	0.332934	0.0552792	1	1	0.498294	0.667095
952	1	0.532622	0.674561	0.373327	0.152174	0.772727	0.496456	0.397521	0.575533	0.144696	0.492349	0.706762	0.127142	1	1	1	1
953	0.0680681	0.134347	0.281313	0.0969583	0.0434783	0.636364	0.299765	0.437808	0.138691	0.104612	0.390996	0.340914	0.0497512	1	1	1	1
954	0.263864	0.162543	0.289363	0.165063	0.0217391	0.25	0.342478	0.598535	0.506686	0.150641	0.0552229	0.170557	0.0154782	1	1	1	1
955	0.230631	0.475505	0.370099	0.119806	0.0434783	0.227273	0.209114	0.407522	0.309531	0.0857306	0.423819	0.259326	0.137092	1	1	1	1
956	0.213614	0.153916	0.179567	0.104527	0.0434783	0.159091	0.093582	0.378504	0.641394	0.217362	0.151253	0.130461	0	1	1	1	1
