# Supplementary material for: Combination of machine learning and data envelopment analysis to measure the efficiency of the Tax Service Office
Source: PeerJ Comput Sci. 2025 Feb 17;11:e2672. doi: 10.7717/peerj-cs.2672 (PMC11888853; doi:10.7717/peerj-cs.2672)
Supplement: Supplemental Information 43 [file peerj-cs-11-2672-s043.xlsx]

## Sheet: simulation_app.py
Bahasa Indonesia	English
WP_BENDAHARA	Number of treasury taxpayers
WP_BADAN	Number of corporate taxpayers
WP_OP_KARYAWAN	Number of employee taxpayers
WP_OP_PENGUSAHA	Number of non-employee taxpayers
JUMLAH_FPP	Number of tax auditors
JUMLAH_AR	Number of account representatives
REALISASI_ANGGARAN	Budget realization amount
KEPATUHAN_SPT	Compliance rate of annual tax return submission
CAPAIAN_PENERIMAAN	Percentage of revenue achievement
PERTUMBUHAN_PENERIMAAN	Percentage of revenue growth achievement
SP2DK_TERBIT	Number of issued tax advisories
SP2DK_CAIR	Number of paid tax advisories
PEMERIKSAAN_SELESAI	Number of completed tax audit
Simulasi Prediksi	Prediction Simulation
data_awal	initial_data
data_baru	new_data
Normalisasi	Normalization
Variabel Input	Input Variables
Variabel Output	Output Variables
Proses	Process
inputan	Input
hasil scaling	Scaling result
Hasil prediksi nilai Efisiensi	Predicted Efficiency Value
sudah mencapai efisien tetapi Variabel input masih bisa ditambah atau variabel output masih bisa dikurangi	Already efficient, but input variables can still be increased or output variables can still be reduced
Belum efisien variabel input masih bisa dikurangi atau variabel output masih bisa ditambah	Not efficient yet, input variables can still be reduced or output variables can still be increased
sudah mencapai efisien	Already efficient
data tidak ada	Data not available
hasil_predict	prediction result
hasil_minmax	minmax result
data_awal	initial data
data_baru	new data
data_kolom	column data
model_gb	model gb
model_mlp	MLP model
col_names	column names
df_input	input dataframe
df_scal	scaled dataframe
data_fix	fixed data
data_set	dataset
jumlah_fpp	number of fpp
jumlah_ar	number of ar
realisasi_anggaran	budget realization
kepatuhan_spt	annual tax return compliance
capai_penerimaan	revenue achievement
pertumbuhan_penerimaan	revenue growth
sp2dk_terbit	issued tax advisories
sp2dk_cair	paid tax advisories
pemeriksaan_selesai	completed tax audit

## Sheet: data_fix
Bahasa Indonesia	English
KD_KPP	ID_Office
NAMA_KANTOR	OFFICE NAME
NAMA_KANWIL	REGIONAL OFFICE NAME
WP_BENDAHARA	Number of treasury taxpayers
WP_BADAN	Number of corporate taxpayers
WP_OP_KARYAWAN	Number of employee taxpayers
WP_OP_PENGUSAHA	Number of non-employee taxpayers
JUMLAH_FPP	Number of tax auditors
JUMLAH_AR	Number of account representatives
REALISASI_ANGGARAN	Budget realization amount
KEPATUHAN_SPT	Compliance rate of annual tax return submission
CAPAIAN_PENERIMAAN	Percentage of revenue achievement
PERTUMBUHAN_PENERIMAAN	Percentage of revenue growth achievement
SP2DK_TERBIT	Number of issued tax advisories
SP2DK_CAIR	Number of paid tax advisories
PEMERIKSAAN_SELESAI	Number of completed tax audit

## Sheet: ga_gbr.py
Bahasa Indonesia	English
Membangun model GB Regressor dengan parameter yang diberikan	Building the GB Regressor model with the given parameters
Hasil Algoritma Genetika GA-GBR	Genetic Algorithm GA-GBR Result
Iterasi	Iteration
Mendefinisikan batasan dan dimensi masalah	Defining the boundaries and dimensions of the problem
Batasan variabel dalam masalah	Variable boundaries in the problem
Menampilkan hasil grafik menggunakan Streamlit	Displaying the result graph using Streamlit
Data lengkap	Complete data
fitur	feature
model_gb	GB model (Gradient Boosting Model)
hasil_efisiensi_klaster	cluster_efficiency_results
hasil_efisiensi_klaster.xlsx	cluster_efficiency_results.xlsx
EFISIENSI_IO	IO_EFFICIENCY
EFISIENSI_OO	OO_EFFICIENCY
Hasil Algoritma Genetika GA-GBR	Genetic Algorithm GA-GBR Results
Iterasi	Iteration
model_gb	GB model (Gradient Boosting Model)

## Sheet: ga_mlpr.py
Bahasa Indonesia	English
hasil_efisiensi_klaster	cluster_efficiency_results
hasil_efisiensi_klaster.xlsx	cluster_efficiency_results.xlsx
EFISIENSI_IO	IO_EFFICIENCY
EFISIENSI_OO	OO_EFFICIENCY
Fungsi kecocokan (fitness function) yang harus dioptimalkan	The fitness function that must be optimized
Hasil Algoritma Genetika GA-MLPR	Genetic Algorithm GA-MLPR Result
Menjalankan algoritma genetika	Running the genetic algorithm
Menampilkan hasil grafik menggunakan Streamlit	Displaying the result graph using Streamlit
Batasan variabel dalam masalah	Variable boundaries in the problem
Algoritma Genetika	Genetic Algorithm
Iterasi	Iteration
Model GradientBoostingRegressor	GradientBoostingRegressor Model
Algoritma Genetika GA-GBR	Genetic Algorithm GA-GBR
Model Neural Network	Neural Network Model
Fungsi	Function
Algoritma	Algorithm

## Sheet: clustering_efficiency_result.xl
Bahasa Indonesia	English
KD_KPP	ID_Office
NAMA_KANTOR	OFFICE NAME
NAMA_KANWIL	REGIONAL OFFICE NAME
WP_BENDAHARA	Number of treasury taxpayers
WP_BADAN	Number of corporate taxpayers
WP_OP_KARYAWAN	Number of employee taxpayers
WP_OP_PENGUSAHA	Number of non-employee taxpayers
JUMLAH_FPP	Number of tax auditors
JUMLAH_AR	Number of account representatives
REALISASI_ANGGARAN	Budget realization amount
KEPATUHAN_SPT	Compliance rate of annual tax return submission
CAPAIAN_PENERIMAAN	Percentage of revenue achievement
PERTUMBUHAN_PENERIMAAN	Percentage of revenue growth achievement
SP2DK_TERBIT	Number of issued tax advisories
SP2DK_CAIR	Number of paid tax advisories
PEMERIKSAAN_SELESAI	Number of completed tax audit
KLASTER	Cluster
EFISIENSI_IO	IO Efficiency
EFISIENSI_OO	OO Efficiency

## Sheet: ga_rfr.py
Bahasa Indonesia	English Translation
Membangun model Random Forest Regressor dengan parameter yang diberikan	Building the Random Forest Regressor model with the given parameters
Inisialisasi model Random Forest Regressor dengan hyperparameter yang dioptimasi	Initializing the Random Forest Regressor model with optimized hyperparameters
Validasi Silang K-Fold	K-Fold Cross Validation
Hasil Algoritma Genetika GA-RFR	Genetic Algorithm GA-RFR Results
Iterasi	Iteration
Mendefinisikan batasan dan dimensi masalah	Defining the boundaries and dimensions of the problem
Algoritma Genetika	Genetic Algorithm
Hasil Algoritma Genetika GA-RFR	Genetic Algorithm GA-RFR Result
hasil_efisiensi_klaster	cluster_efficiency_results
hasil_efisiensi_klaster.xlsx	cluster_efficiency_results.xlsx
EFISIENSI_IO	IO_EFFICIENCY
EFISIENSI_OO	OO_EFFICIENCY
Fungsi kecocokan (fitness function) yang harus dioptimalkan	The fitness function that must be optimized
Fungsi	Function

## Sheet:  prep_app.py
Bahasa Indonesia	English Translation
Membangun model SVM Regressor dengan parameter yang diberikan	Building the SVM Regressor model with the given parameters
Inisialisasi model Random Forest Regressor dengan hyperparameter yang dioptimasi	Initializing the Random Forest Regressor model with optimized hyperparameters
Validasi Silang K-Fold	K-Fold Cross Validation
Normalisasi	Normalization
Pemilihan Variabel	Variable Selection
Deteksi Outlier	Outlier Detection
Variabel Input	Input Variable
Variabel Output	Output Variable
Tentukan batas bawah dan atas untuk setiap kolom menggunakan metode IQR	Set the lower and upper bounds for each column using the IQR method
Kembalikan DataFrame outlier	Return the outlier DataFrame
Jumlah Outlier	Number of Outliers
Tidak ada Outlier	No Outliers
Variabel	Variable
Jumlah FPP	Number of tax auditors
Jumlah AR	Number of account representatives
Realisasi Anggaran	Budget Realization
Pemilihan Variabel	Variable Selection
WP_BENDAHARA	Number of treasury taxpayers
WP_BADAN	Number of corporate taxpayers
WP_OP_KARYAWAN	Number of employee taxpayers
WP_OP_PENGUSAHA	Number of non-employee taxpayers
JUMLAH_FPP	Number of tax auditors
JUMLAH_AR	Number of account representatives
REALISASI_ANGGARAN	Budget realization amount
KEPATUHAN_SPT	Compliance rate of annual tax return submission
CAPAIAN_PENERIMAAN	Percentage of revenue achievement
PERTUMBUHAN_PENERIMAAN	Percentage of revenue growth achievement
SP2DK_TERBIT	Number of issued tax advisories
SP2DK_CAIR	Number of paid tax advisories
PEMERIKSAAN_SELESAI	Number of completed tax audit
Kolom	Column
Boxplot Outlier	Boxplot Outlier

## Sheet: ga_svr.py
Bahasa Indonesia	English Translation
Membangun model SVM Regressor dengan parameter yang diberikan	Building the SVM Regressor model with the given parameters
Validasi Silang K-Fold	K-Fold Cross Validation
Hasil Algoritma Genetika GA-SVR	Results of the Genetic Algorithm GA-SVR
Iterasi	Iterations
Batasan variabel dalam masalah	Variable boundaries in the problem
Batasan variabel	Variable boundaries
Jumlah iterasi	Number of iterations
Algoritma Genetika	Genetic Algorithm
Model SVR	SVR Model
Maksimalkan Fitness	Maximize fitness
Algoritma Genetika GA-SVR	Genetic Algorithm GA-SVR
Mendefinisikan batasan dan dimensi masalah	Defining the boundaries and dimensions of the problem
Batasan variabel dalam masalah (misalnya: [-10, 10] untuk setiap variabel)	Variable boundaries in the problem (e.g., [-10, 10] for each variable)
Menjalankan algoritma genetika	Running the genetic algorithm
Menampilkan hasil grafik menggunakan Streamlit	Displaying the result graph using Streamlit

## Sheet: benchmark.xlsx
Bahasa Indonesia	English Translation
KD_KPP	KD_KPP (Tax Office Code)
WP_BENDAHARA	WP_TREASURER (Treasurer)
WP_BADAN	WP_ORGANIZATION (Organization)
WP_OP_KARYAWAN	WP_EMPLOYEE (Employee)
WP_OP_PENGUSAHA	WP_ENTREPRENEUR (Entrepreneur)
JUMLAH_FPP	NUMBER_OF_FPP (Number of FPP)
JUMLAH_AR	NUMBER_OF_AR (Number of AR)
REALISASI_ANGGARAN	BUDGET_REALIZATION (Budget Realization)
KEPATUHAN_SPT	SPT_COMPLIANCE (Tax Return Compliance)
CAPAIAN_PENERIMAAN	REVENUE_ACHIEVEMENT (Revenue Achievement)
PERTUMBUHAN_PENERIMAAN	REVENUE_GROWTH (Revenue Growth)
SP2DK_TERBIT	SP2DK_ISSUED (SP2DK Issued)
SP2DK_CAIR	SP2DK_DISBURSED (SP2DK Disbursed)
PEMERIKSAAN_SELESAI	INSPECTION_COMPLETED (Inspection Completed)
EFISIENSI_IO	IO_EFFICIENCY (IO Efficiency)
EFISIENSI_OO	OO_EFFICIENCY (OO Efficiency)
EF_IO	EF_IO (IO Efficiency)
EF_OO	EF_OO (OO Efficiency)

## Sheet: regression.py
Bahasa Indonesia	English
hasil_efisiensi_klaster.xlsx	result_efficiency_clusters.xlsx
KD_KPP	KD_KPP (Tax Office Code)
EFISIENSI_IO	IO_EFFICIENCY (IO Efficiency)
EFISIENSI_OO	OO_EFFICIENCY (OO Efficiency)
Halaman Regresi	Regression Page
Menampilkan gambar menggunakan	Display images using
Eksekusi GA-SVR	GA-SVR Execution
